# Supplementary material
Source: Springer Nature journal article supplement (https://www.springermedizin.de/resource/supplementary/12958_2012_1039_MOESM5_ESM.pdf/9566422)

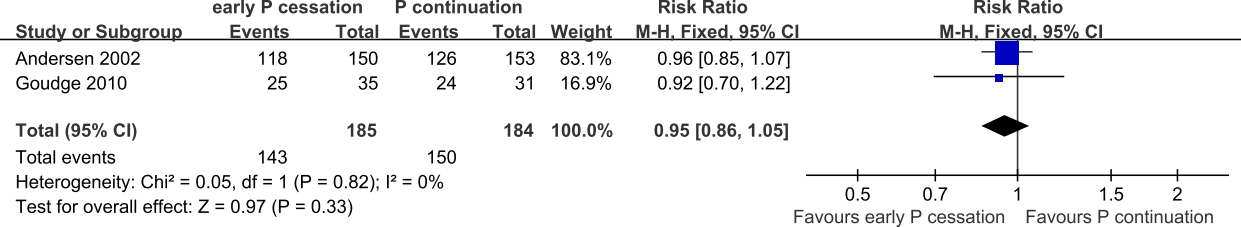

Supplement: MOESM5 [file 9566422]
